# Supplementary material for: Determinants of Mortality from Cardiovascular Disease in the Slums of Nairobi, Kenya
Source: PubMed Central journal article supplement (PMC7218782; doi:10.5334/gh.787), 2020-04-10
Supplement: gh-15-1-787-s1.pdf [file gh-15-1-787-s1.pdf]

**Supplementary Figure 1: Comparison of mean estimates for height and weight with 0 (no imputation) and 10 imputations per missing value**

```
. mi xeq 0 10: summarize cvd_weight2 cvd_height2
```

*m*=0 data:

```
-> summarize cvd_weight2 cvd_height2
```

| Variable    | Obs   | Mean     | Std. Dev. | Min   | Max   |
|-------------|-------|----------|-----------|-------|-------|
| cvd_weight2 | 4,186 | 63.23421 | 11.92463  | 30    | 165.2 |
| cvd_height2 | 4,186 | 163.219  | 8.494641  | 101.9 | 210   |

*m*=10 data:

```
-> summarize cvd_weight2 cvd_height2
```

| Variable    | Obs   | Mean     | Std. Dev. | Min   | Max   |
|-------------|-------|----------|-----------|-------|-------|
| cvd_weight2 | 4,290 | 63.23212 | 11.89678  | 30    | 165.2 |
| cvd_height2 | 4,290 | 163.212  | 8.478182  | 101.9 | 210   |

| Variable    | N    | Without imputation<br>Mean (SD) | With 10 imputations<br>Mean (SD) |
|-------------|------|---------------------------------|----------------------------------|
| Weight (Kg) | 4186 | 63.23 (11.9)                    | 63.23 (11.9)                     |
| Height (cm) | 4290 | 163.2 (8.5)                     | 163.2 (8.5)                      |
