# Supplementary material for: Determinants of Mortality from Cardiovascular Disease in the Slums of Nairobi, Kenya
Source: PubMed Central journal article supplement (PMC7218782; doi:10.5334/gh.787), 2020-04-10
Supplement: gh-15-1-787-s2.pdf [file gh-15-1-787-s2.pdf]

**Supplementary Table 1: Key baseline sociodemographic characteristics of migrants compared with non-migrants**

| Factor                    | Migrants (N = 16) |             | Non-migrants (N = 4290) |               |
|---------------------------|-------------------|-------------|-------------------------|---------------|
|                           | Female (n=9)      | Male (n=7)  | Female (n=1887)         | Male (n=2403) |
| Age (SD)                  | 44.2 (9.9)        | 53.1 (14.9) | 47.9 (13.4)             | 48.9 (11.7)   |
| Married/living together   | 4 (44.4)          | 5 (71.4)    | 832 (44.1)              | 1424 (59.3)   |
| Primary school and higher | 5 (55.6)          | 4 (57.1)    | 848 (44.9)              | 1547 (64.4)   |
